# Supplementary material
Source: PubMed Central journal article supplement (PMC6994189)
Supplement: NIHMS1063511-supplement-Fig_S4.pdf [file NIHMS1063511-supplement-Fig_S4.pdf]

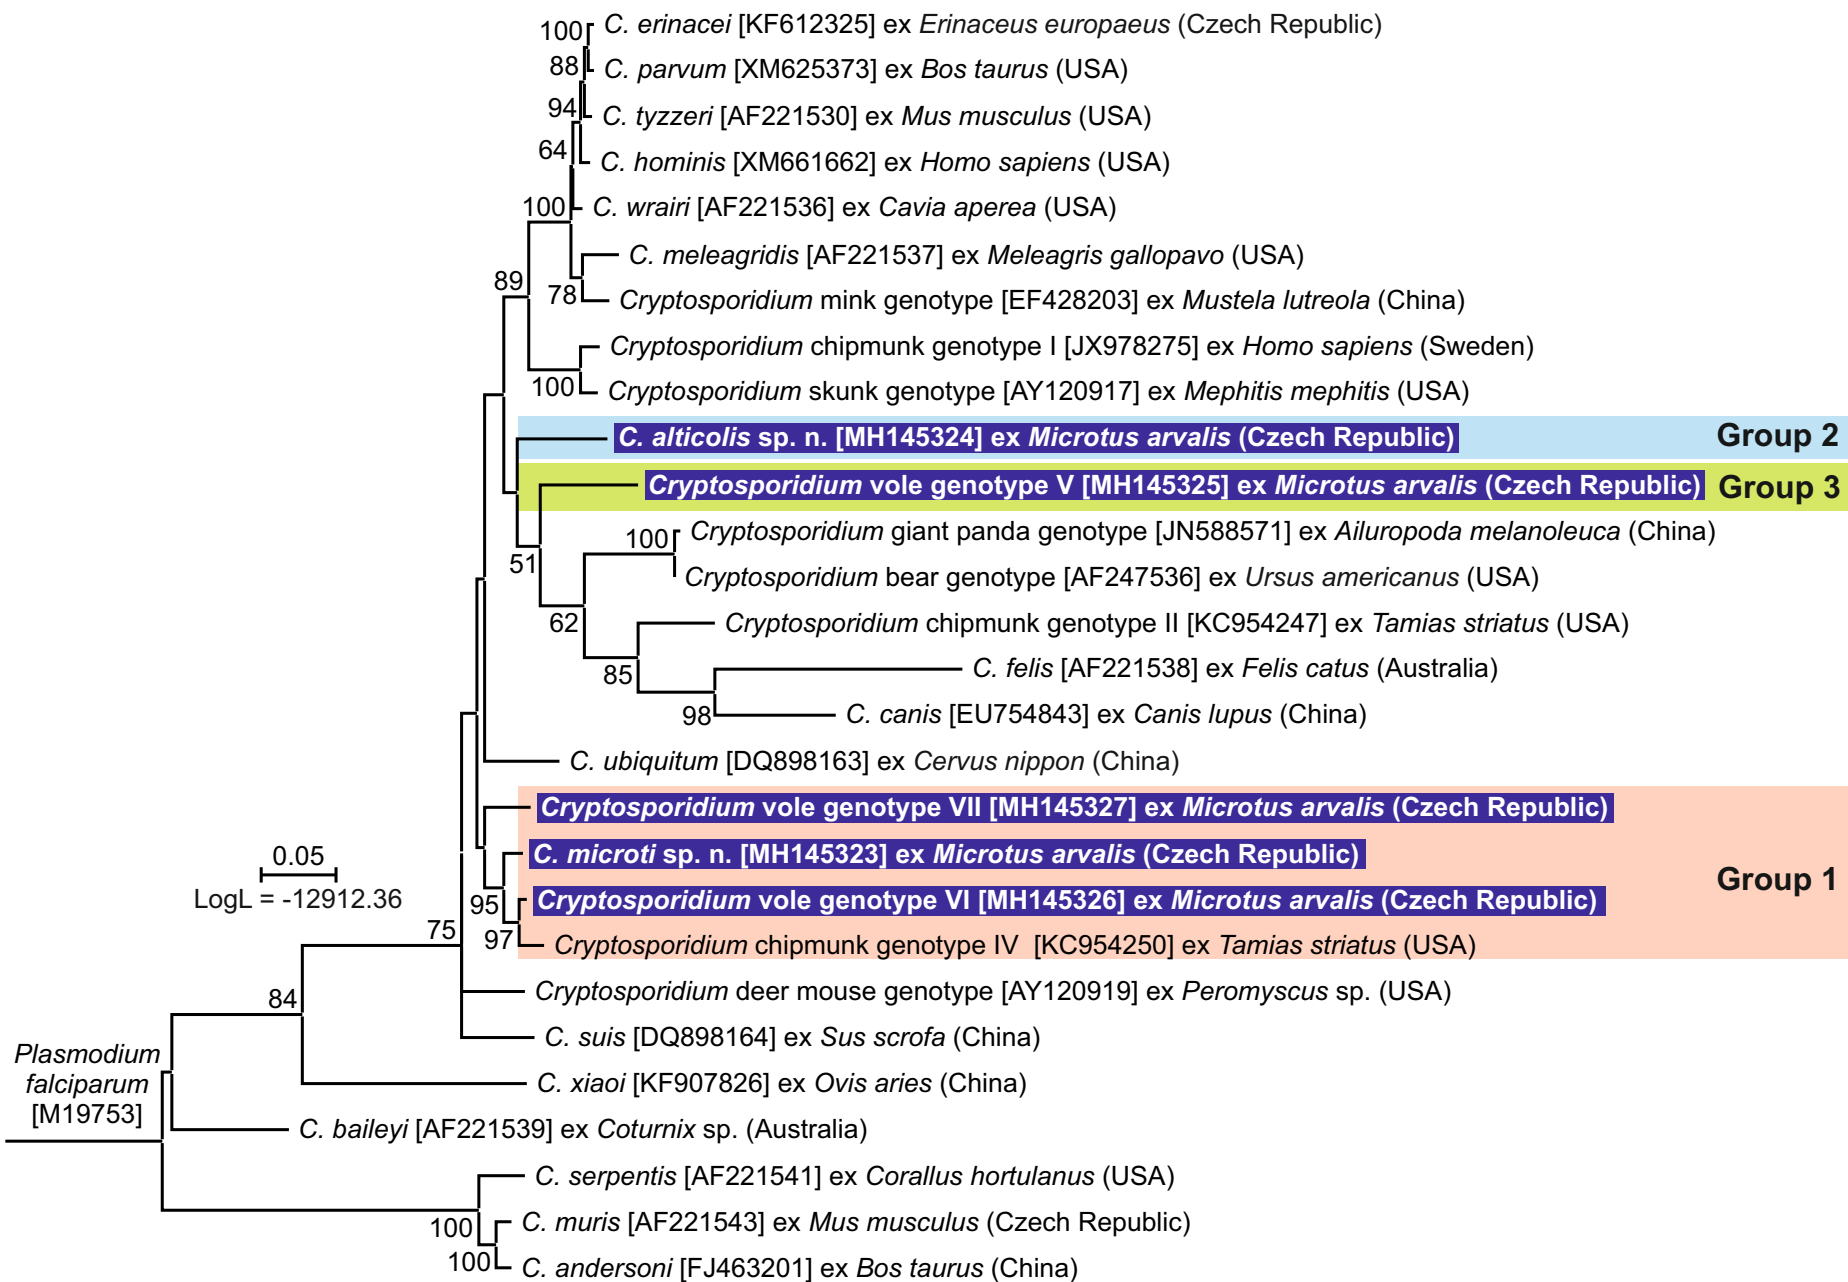

**Supplementary Fig. S4.** A maximum likelihood (ML) tree based on 70 kilodalton heat shock protein (HSP70) gene sequences. A representative of each HSP70 species/genotype from this study is highlighted in bold and boxed. GenBank accession numbers, host species (Latin name) and country of isolate origin are shown in after the isolate identifier. GenBank accession numbers are shown in parenthesis after the isolate identifier. The ML tree was rooted with a HSP70 sequence from *Plasmodium falciparum* [Acc. No.: M19753]. Numbers at the nodes represent the bootstrap values gaining more than 50% support. Branch length scale bar indicates the number of substitutions per site.
