# Supplementary material
Source: PubMed Central journal article supplement (PMC6994189)
Supplement: NIHMS1063511-supplement-Table_S1.pdf [file NIHMS1063511-supplement-Table_S1.pdf]

**Supplementary Table S1.** Occurrence of species of the genus *Cryptosporidium* infecting representatives of the subfamily Arvicolinae identified on the basis of microscopic<sup>1</sup> and molecular<sup>2</sup> tools amplifying partial sequences of small subunit ribosomal rRNA (SSU), *Cryptosporidium* oocyst wall protein (COWP), and 60 kDa glycoprotein (GP60) genes.

| Host (common name)                                        | Country                                  | <i>Cryptosporidium</i> spp.                    | Loci for genotyping | No. of screened/positive | References                              |
|-----------------------------------------------------------|------------------------------------------|------------------------------------------------|---------------------|--------------------------|-----------------------------------------|
| <i>Myodes gapperi</i><br>(southern red-backed vole)       | USA                                      | muskrat genotype I <sup>2</sup>                | SSU                 | 5/4                      | Feng et al. (2007)                      |
|                                                           |                                          | <i>Cryptosporidium</i> sp. <sup>1</sup>        | –                   | 301/19                   | Ziegler et al. (2007a)                  |
|                                                           |                                          | muskrat genotype II <sup>2</sup>               | –                   | NS/1                     |                                         |
|                                                           |                                          | <i>Cryptosporidium</i> sp. <sup>2</sup>        | SSU                 | NS/6                     | Ziegler et al. (2007b)                  |
|                                                           |                                          | <i>C. parvum</i> <sup>2</sup>                  | –                   | NS/1                     |                                         |
|                                                           |                                          | <i>Cryptosporidium</i> spp. <sup>2</sup>       | SSU, actin          | 27/15                    | Stenger et al. (2018)                   |
| <i>Myodes glareolus</i><br>(bank vole)                    | Finland                                  | <i>C. parvum</i> <sup>1</sup>                  | –                   | 131/1                    | Laakkonen et al. (1994)                 |
|                                                           |                                          | <i>C. tyzzeri</i> <sup>2</sup>                 | COWP                | 12/5                     | Bajer et al. (2003)                     |
|                                                           | Poland                                   | <i>C. parvum</i> <sup>1</sup>                  | –                   | 459/324                  | Bajer et al. (2002)                     |
|                                                           |                                          | <i>Cryptosporidium</i> sp. <sup>1</sup>        | –                   | 8/5                      | Bednarska et al. (2007)                 |
|                                                           |                                          | <i>Cryptosporidium</i> spp. <sup>1</sup>       | –                   | 275/55                   | Sinski et al. (1998)                    |
|                                                           |                                          | <i>Cryptosporidium</i> spp. <sup>1</sup>       | –                   | 102/23                   | Sinski et al. (1993)                    |
|                                                           |                                          | <i>Cryptosporidium</i> spp. <sup>2</sup>       | –                   | 1523/819                 | Bajer (2008)                            |
|                                                           | Slovakia                                 | <i>C. parvum</i> <sup>2</sup>                  | SSU, gp60           | 75/3                     |                                         |
|                                                           |                                          | <i>C. scrofarum</i> <sup>2</sup>               | SSU                 | 75/4                     |                                         |
|                                                           |                                          | environment isolate <sup>2</sup>               | SSU                 | 75/6                     | Danišová et al. (2017)                  |
|                                                           | Spain                                    | muskrat genotype I <sup>2</sup>                | SSU                 | 75/3                     |                                         |
|                                                           |                                          | <i>C. parvum</i> <sup>1</sup>                  | –                   | 49/10                    | Torres et al. (2000)                    |
|                                                           | UK                                       | <i>C. muris</i> <sup>1</sup>                   | –                   | 49/2                     |                                         |
| <i>C. muris</i> <sup>1</sup>                              |                                          | –                                              | 123/2               | Chalmers et al. (1997)   |                                         |
| USA                                                       | <i>C. parvum</i> <sup>1</sup>            | –                                              | 123/11              |                          |                                         |
|                                                           | <i>Cryptosporidium</i> spp. <sup>2</sup> | SSU, actin                                     | 140/10              | Stenger et al. (2018)    |                                         |
| <i>Myodes glareolus skomerensis</i><br>(Skomer bank vole) | UK                                       | <i>C. parvum</i> <sup>1</sup>                  | –                   | 114/9                    |                                         |
|                                                           |                                          | <i>C. muris</i> <sup>1</sup>                   | –                   | 114/55                   | Bull et al. (1998)                      |
| <i>Myodes rufocanus bedfordiae</i><br>(red-backed vole)   | Japan                                    | <i>Cryptosporidium</i> sp. Mrb001 <sup>2</sup> | SSU                 | NS                       | Unpublished (GenBank Acc. No. AB477098) |
| <i>Microtus agrestis</i><br>(field vole)                  | Finland                                  | <i>Cryptosporidium</i> sp. <sup>1</sup>        | –                   | 131/1                    | Laakkonen et al. (1994)                 |
|                                                           | Czech Republic                           | <i>Cryptosporidium</i> spp. <sup>2</sup>       | SSU, actin          | 353/50                   | Stenger et al. (2018)                   |
| <i>Microtus arvalis</i><br>(common vole)                  | Poland                                   | <i>C. tyzzeri</i> <sup>2</sup>                 | COWP, SSU           | 12/6                     | Bajer et al. (2003)                     |
|                                                           |                                          | <i>C. parvum</i> <sup>1</sup>                  | –                   | 274/200                  | Bajer et al. (2002)                     |
|                                                           |                                          | <i>Cryptosporidium</i> spp. <sup>1</sup>       | –                   | 7/5                      | Bednarska et al. (2007)                 |
|                                                           |                                          | <i>Cryptosporidium</i> spp. <sup>1</sup>       | –                   | 19/4                     | Sinski et al. (1998)                    |
|                                                           |                                          | <i>Cryptosporidium</i> spp. <sup>1</sup>       | –                   | 419/261                  | Bajer (2008)                            |
| <i>Microtus pennsylvanicus</i><br>(meadow vole)           | USA                                      | vole genotype I <sup>2</sup>                   | SSU                 | 10/1                     | Feng et al. (2007)                      |
|                                                           |                                          | muskrat genotype II <sup>2</sup>               | –                   | 10/2                     |                                         |
|                                                           |                                          | <i>Cryptosporidium</i> sp. <sup>1</sup>        | –                   | 297/13                   | Ziegler et al. (2007a)                  |
|                                                           |                                          | muskrat genotype II <sup>2</sup>               | SSU                 | NS/5                     | Ziegler et al. (2007b)                  |
|                                                           |                                          | <i>Cryptosporidium</i> sp. <sup>2</sup>        | –                   | NS/4                     |                                         |
|                                                           |                                          | <i>Cryptosporidium</i> spp. <sup>2</sup>       | SSU, actin          | 311/163                  | Stenger et al. (2018)                   |
| <i>Microtus pinetorum</i><br>(woodland vole)              | USA                                      | <i>Cryptosporidium</i> spp. <sup>2</sup>       | SSU, actin          | 41/21                    | Stenger et al. (2018)                   |
| <i>Ondatra zibethicus</i><br>(muskrat)                    | Poland                                   | <i>C. parvum</i> <sup>1</sup>                  | –                   | 9/5                      | Sinski et al. (1998)                    |
|                                                           |                                          | <i>C. parvum</i> <sup>2</sup>                  | SSU                 | 6/6                      | Perz and Le Blancq (2001)               |
|                                                           | USA                                      | <i>Cryptosporidium</i> sp. <sup>1</sup>        | –                   | 149/1                    | Ziegler et al. (2007a)                  |
|                                                           |                                          | <i>Cryptosporidium</i> spp. <sup>2</sup>       | SSU, actin          | 42/4                     | Stenger et al. (2018)                   |
|                                                           |                                          | muskrat genotype I <sup>2</sup>                | SSU                 | 237/24                   |                                         |
|                                                           |                                          | muskrat genotype II <sup>2</sup>               | SSU                 | 237/6                    | Zhou et al. (2004)                      |
|                                                           |                                          | muskrat genotype I <sup>2</sup>                | SSU                 | 1/1                      | Feng et al. (2007)                      |
| muskrat genotype I <sup>2</sup>                           | SSU                                      | 1/1                                            | Xiao et al. (2002)  |                          |                                         |

NS – not specified
